# Supplementary material for: Long-Term Patterns in Forest Soil CO2 Flux in a Pacific Northwest Temperate Rainforest
Source: MDPI journal article supplement (doi:10.3390/f15010161), 2024-01-12
Supplement: s1 [file s1]

Table S1. Model parameter and random effects model output for average plot  $F_s$  ( $\mu\text{mol C m}^{-2} \text{s}^{-1}$ ) LMER mixed effects model including season, stand type, 10-day precipitation and air-temperature as fixed effects.

| <i>Predictors</i>                | <b>Dependent variable</b> |               |              |
|----------------------------------|---------------------------|---------------|--------------|
|                                  | <i>Estimates</i>          | <i>CI</i>     | <i>p</i>     |
| (Intercept)                      | -0.66                     | -4.08 – 2.77  | 0.706        |
| Season [Sp]                      | -0.32                     | -3.91 – 3.26  | 0.860        |
| Season [Su]                      | 2.57                      | -1.22 – 6.37  | 0.183        |
| Season [W]                       | 3.04                      | -0.61 – 6.70  | 0.103        |
| Stand [MCH]                      | 0.58                      | -0.04 – 1.21  | 0.068        |
| Stand [MH]                       | 0.21                      | -0.36 – 0.78  | 0.468        |
| Precip                           | 0.01                      | -0.07 – 0.10  | 0.723        |
| Temp                             | 0.25                      | -0.03 – 0.53  | 0.077        |
| Season [Sp] $\times$ Stand [MCH] | -0.58                     | -1.17 – 0.00  | 0.050        |
| Season [Su] $\times$ Stand [MCH] | 0.31                      | -0.37 – 0.98  | 0.369        |
| Season [W] $\times$ Stand [MCH]  | -0.59                     | -1.30 – 0.12  | 0.105        |
| Season [Sp] $\times$ Stand [MH]  | -0.40                     | -0.92 – 0.13  | 0.141        |
| Season [Su] $\times$ Stand [MH]  | -0.08                     | -0.67 – 0.51  | 0.788        |
| Season [W] $\times$ Stand [MH]   | -0.17                     | -0.79 – 0.46  | 0.601        |
| Precip $\times$ Temp             | -0.00                     | -0.01 – 0.01  | 0.788        |
| Season [Sp] $\times$ Precip      | 0.03                      | -0.06 – 0.11  | 0.538        |
| Season [Su] $\times$ Precip      | -0.12                     | -0.22 – -0.02 | <b>0.018</b> |
| Season [W] $\times$ Precip       | -0.02                     | -0.10 – 0.06  | 0.646        |
| Season [Sp] $\times$ Temp        | 0.09                      | -0.22 – 0.40  | 0.565        |
| Season [Su] $\times$ Temp        | -0.14                     | -0.44 – 0.15  | 0.340        |
| Season [W] $\times$ Temp         | -0.35                     | -0.71 – -0.00 | <b>0.047</b> |

|                               |       |              |              |
|-------------------------------|-------|--------------|--------------|
| (Season [Sp] × Precip) × Temp | -0.00 | -0.01 – 0.00 | 0.404        |
| (Season [Su] × Precip) × Temp | 0.01  | 0.00 – 0.02  | <b>0.027</b> |
| (Season [W] × Precip) × Temp  | 0.00  | -0.01 – 0.01 | 0.600        |

**Random Effects**

|                                                      |               |
|------------------------------------------------------|---------------|
| $\sigma^2$                                           | 0.70          |
| $\tau_{00}$ Plot                                     | 0.16          |
| $\tau_{00}$ month                                    | 0.53          |
| $\tau_{00}$ Year                                     | 0.81          |
| ICC                                                  | 0.68          |
| N <sub>Year</sub>                                    | 8             |
| N <sub>month</sub>                                   | 12            |
| N <sub>Plot</sub>                                    | 29            |
| Observations                                         | 408           |
| Marginal R <sup>2</sup> / Conditional R <sup>2</sup> | 0.343 / 0.790 |

Table S2. Model parameter and random effects model output for a mixed-effects LMER model for a subset of Fs ( $\mu\text{mol C m}^{-2} \text{ s}^{-1}$ ) data where soil moisture and air-temperature were included as fixed effects in addition to season.

| <i>Predictors</i>    | <b>Dependent variable</b> |               |              |
|----------------------|---------------------------|---------------|--------------|
|                      | <i>Estimates</i>          | <i>CI</i>     | <i>p</i>     |
| (Intercept)          | 0.56                      | -3.47 – 4.59  | 0.783        |
| Moist                | -0.04                     | -0.17 – 0.09  | 0.580        |
| STemp                | 0.18                      | -0.18 – 0.54  | 0.329        |
| Season2 [Su]         | 17.99                     | 6.70 – 29.28  | <b>0.002</b> |
| Season2 [W]          | 1.06                      | -9.43 – 11.54 | 0.842        |
| Moist × STemp        | 0.00                      | -0.01 – 0.02  | 0.558        |
| Moist × Season2 [Su] | -0.56                     | -1.14 – 0.02  | 0.058        |

|                                              |       |               |              |
|----------------------------------------------|-------|---------------|--------------|
| Moist $\times$ Season2 [W]                   | 0.03  | -0.27 – 0.33  | 0.867        |
| STemp $\times$ Season2 [Su]                  | -1.14 | -1.92 – -0.35 | <b>0.005</b> |
| STemp $\times$ Season2 [W]                   | -0.20 | -1.40 – 1.00  | 0.744        |
| (Moist $\times$ STemp) $\times$ Season2 [Su] | 0.04  | -0.00 – 0.08  | 0.055        |
| (Moist $\times$ STemp) $\times$ Season2 [W]  | -0.00 | -0.04 – 0.03  | 0.914        |

### Random Effects

|                                                      |               |
|------------------------------------------------------|---------------|
| $\sigma^2$                                           | 0.53          |
| $\tau_{00}$ Plot2                                    | 0.11          |
| $\tau_{00}$ Year2                                    | 0.46          |
| ICC                                                  | 0.51          |
| N Year2                                              | 4             |
| N Plot2                                              | 26            |
| <hr/>                                                |               |
| Observations                                         | 141           |
| Marginal R <sup>2</sup> / Conditional R <sup>2</sup> | 0.582 / 0.797 |
